# Supplementary material for: Study on the Effect of Residual Polymer Superplasticizer on the Properties of Graphene–Cement Composites
Source: MDPI journal article supplement (doi:10.3390/polym16070956), 2024-03-31
Supplement: s1 [file s1]

Supplementary data

# Study on the Effect of Residual Polymer Superplasticizer on the Properties of Graphene–Cement Composites

Ki Yun Kim, Seok Hwan An and Jea Uk Lee \*

Department of Advanced Materials Engineering for Information and Electronics, Integrated Education Institute for Frontier Science and Technology (BK21 Four), Kyung Hee University, 1732 Deogyong-daero, Giheung-gu, Yongin-si 17104, Gyeonggi-do, Republic of Korea; 12rldbs@khu.ac.kr (K.Y.K.); ansh0703@khu.ac.kr (S.H.A.)

\* Correspondence: leeu@khu.ac.kr; Tel.: +82-31-201-3655

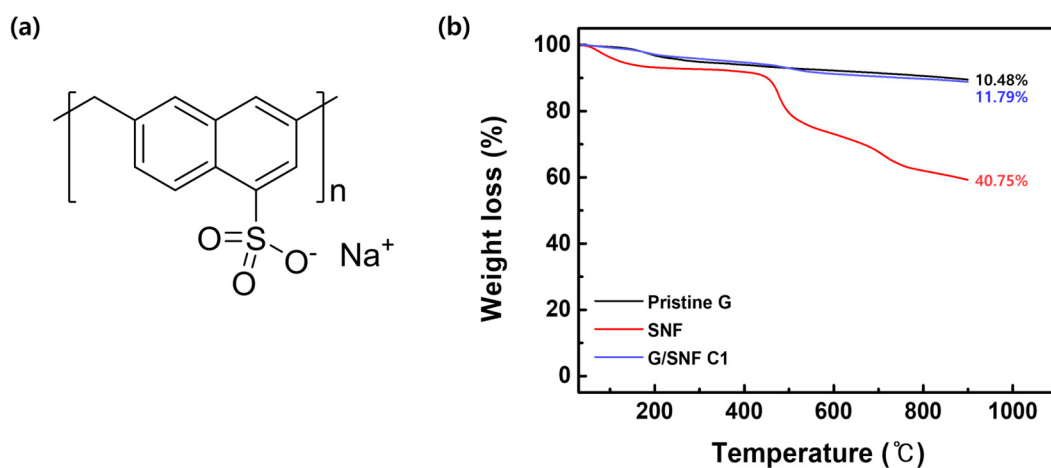

**Figure S1.** (a) Chemical structure of SNF. (b) TGA graphs of pristine graphene, pure SNF, and G/SNF C1.

**Citation:** Kim, K.Y.; An, S.H.; Lee, J.U. Study on the Effect of Residual Polymer Superplasticizer on the Properties of Graphene–Cement Composites. *Polymers* **2024**, *16*, 956. <https://doi.org/10.3390/polym16070956>

Academic Editors: Quantao Liu, Wei Du, Yongbin Yan and Xiaobin Han

Received: 11 March 2024  
Revised: 28 March 2024  
Accepted: 29 March 2024  
Published: 31 March 2024

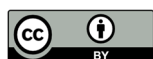

**Copyright:** © 2024 by the authors. Licensee MDPI, Basel, Switzerland. This article is an open access article distributed under the terms and conditions of the Creative Commons Attribution (CC BY) license (<https://creativecommons.org/licenses/by/4.0/>).

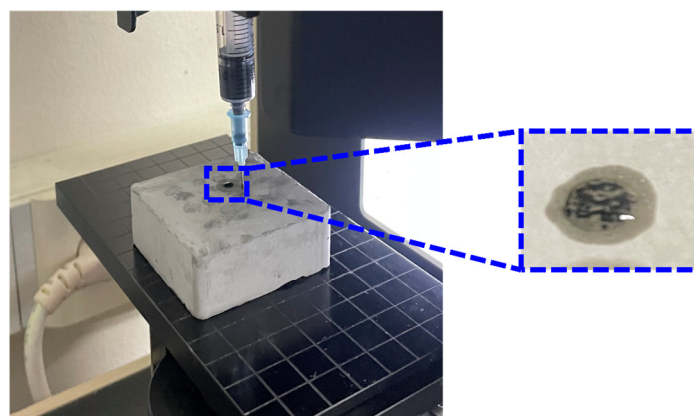

**Figure S2.** Photo image of contact angle measurement of pristine graphene aqueous dispersion with cement plate.

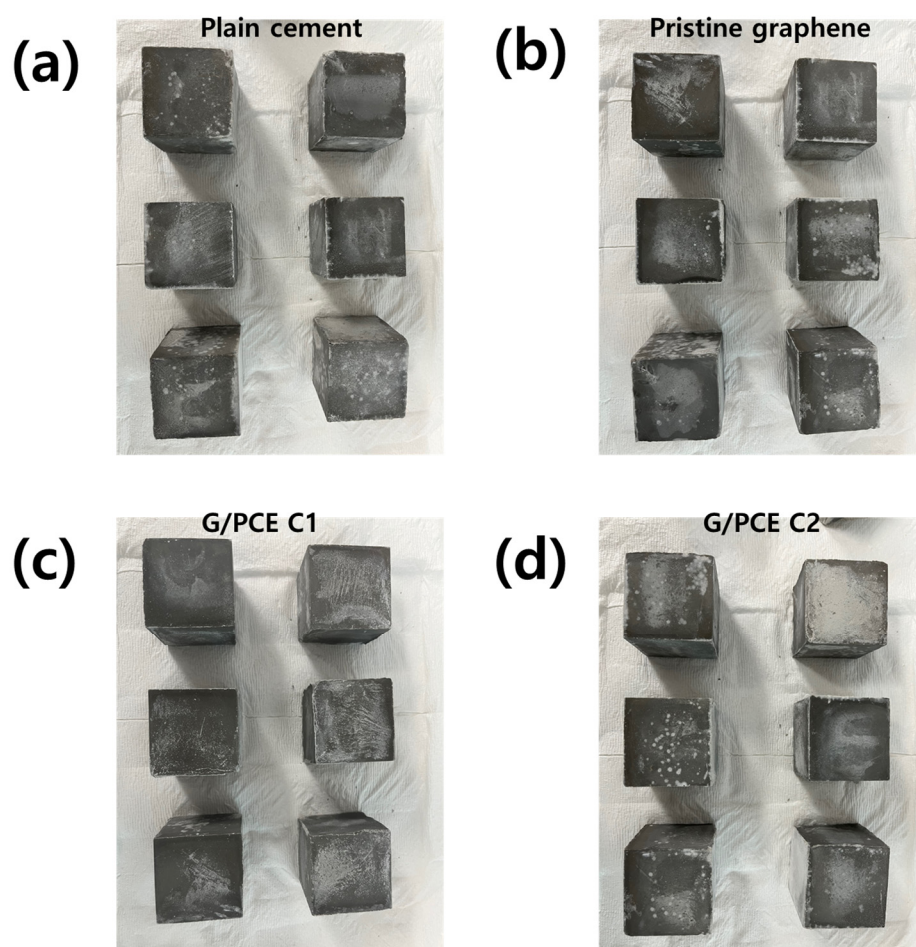

**Figure S3.** Photographs of (a) plain cement and GCC samples made from (b) pristine graphene, (c) G/PCE C1, and (d) G/PCE C2 dispersions.
